# Supplementary material for: γ-Aminobutyric acid (GABA) signalling in human pancreatic islets is altered in type 2 diabetes
Source: PubMed Central journal article supplement (PMC3369140; doi:10.1007/s00125-012-2548-7), 2012-04-27

**ESM Figure 2. Glucose stimulated insulin secretion and inhibited glucagon secretion in isolated pancreatic islets from normoglycemic and type 2 diabetic individuals.**

(a) Insulin release was significantly increased in 16.7 mmol/l glucose as compared to 1 mmol/l glucose, in islets from both normoglycemic (grey bar) and type 2 diabetic (black bar) individuals.

(b) Glucagon release was significantly decreased in 16.7 mmol/l glucose as compared to in 1 mmol/l glucose, in islets from both normoglycemic and type 2 diabetic individuals.

Data were presented as mean with SEM. \*,  $P < 0.05$ , \*\*\*,  $P < 0.001$ .

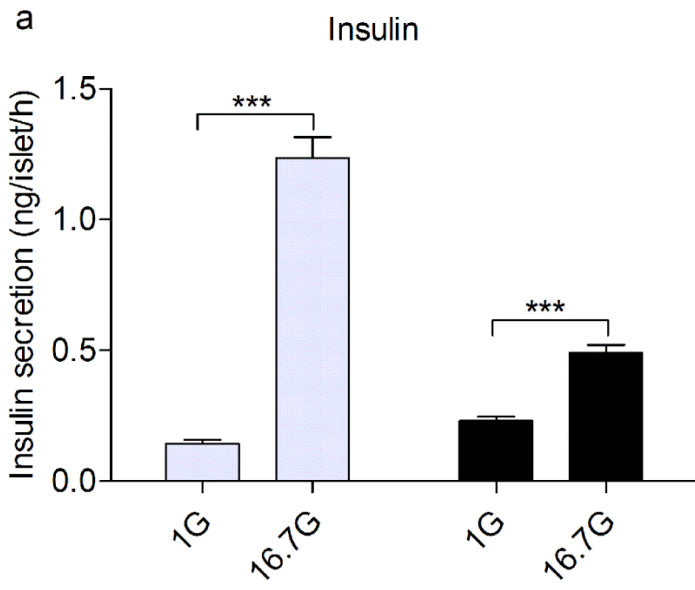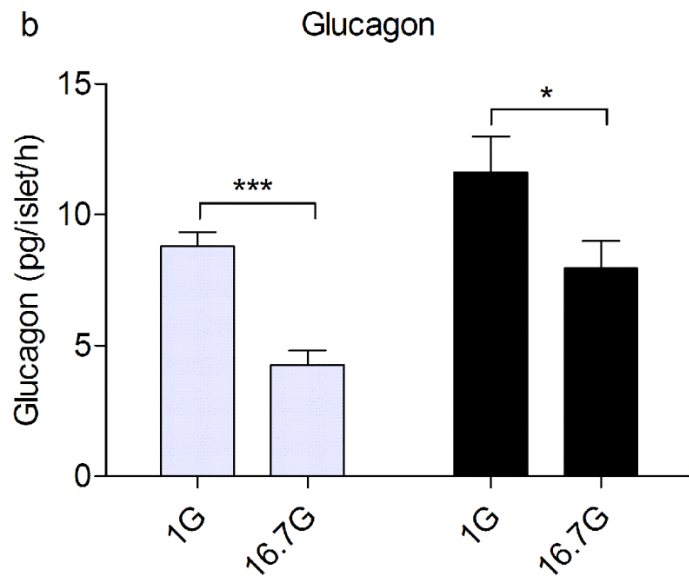

Supplement: 125_2012_2548_MOESM2_ESM.pdf [file 125_2012_2548_MOESM2_ESM.pdf]
