# Supplementary material for: γ-Aminobutyric acid (GABA) signalling in human pancreatic islets is altered in type 2 diabetes
Source: PubMed Central journal article supplement (PMC3369140; doi:10.1007/s00125-012-2548-7), 2012-04-27
Supplement: 125_2012_2548_MOESM3_ESM.pdf [file 125_2012_2548_MOESM3_ESM.pdf]

ESM Table 1. Primer sequences used for qRT-PCR.

| Gene                         | Primer                                                               | Product size (bp) | Reference Number |
|------------------------------|----------------------------------------------------------------------|-------------------|------------------|
| $\alpha$ 1 ( <i>GABRA1</i> ) | F: GGATTGGGAGAGCGTGTAACC<br>R: TGAAACGGGTCCGAAACTG                   | 66                | NM_000806        |
| $\alpha$ 2 ( <i>GABRA2</i> ) | F: GTTCAAGCTGAATGCCCAAT<br>R: ACCTAGAGCCATCAGGAGCA                   | 160               | NM_000807        |
| $\alpha$ 3 ( <i>GABRA3</i> ) | F: CAACTTGTTTCAGTTCATTCATCCTT<br>R:<br>CTTGTTTGTGTGATTATCATCTTCTTAGG | 102               | NM_000808        |
| $\alpha$ 4 ( <i>GABRA4</i> ) | F: TTGGGGGTCTGTACAGAAG<br>R: TCTGCCTGAAGAACACATCCA                   | 105               | NM_000809        |
| $\alpha$ 5 ( <i>GABRA5</i> ) | F: CTTCTCGGCGCTGATAGAGT<br>R: CGCTTTTTCTTGATCTTGGC                   | 105               | NM_000810        |
| $\alpha$ 6 ( <i>GABRA6</i> ) | F: ACCCACAGTGACAATATCAAAAGC<br>R: GGAGTCAGGATGCAAAACAATCT            | 67                | NM_000811        |
| $\beta$ 1( <i>GABRB1</i> )   | F: GTACAAAATCGAGAGAGTCTGGG<br>R: GCG AAT GTC ATA TCC TTT GAG CA      | 144               | NM_000812        |
| $\beta$ 2( <i>GABRB2</i> )   | F: GCAGAGTGCAATGACCCTAGT<br>R: TGGCAATGCAATGTTTCATCCC                | 137               | NM_021911        |
| $\beta$ 3( <i>GABRB3</i> )   | F: CAAGCTGTTGAAAGGCTACGA<br>R: ACTTCGGAACCATGTCGATG                  | 108               | NM_000814        |
| $\gamma$ 1( <i>GABRG1</i> )  | F: CCTTTTCTTCTGCGGAGTCAA<br>R: CATCTGCCTTATCAACACAGTTTCC             | 91                | NM_173536        |
| $\gamma$ 2( <i>GABRG2</i> )  | F: CACAGAAAATGACGGTGTGG<br>R: TCACCCTCAGGAACCTTTTGG                  | 136               | NM_000816        |
| $\gamma$ 3( <i>GABRG3</i> )  | F: AACCACCACCACGAAGAAGA<br>R: CCTCATGTCCAGGAGGGAAT                   | 113               | NM_033223        |
| $\delta$ ( <i>GABRD</i> )    | F: ACCACGGAGCTGATGAACTT<br>R: AGGGCATGTAGGATTGGATG                   | 109               | NM_000815        |
| $\epsilon$ ( <i>GABRE</i> )  | F: TGGATTCTCACTCTTGCCCTCTA<br>R: GGAGTTCTTCTCATTGATTTCAAGCT          | 107               | NM_004961        |
| $\theta$ ( <i>GABRQ</i> )    | F: CCAGGGTGACAATTGGCTTAA<br>R: CCCGCAGATGTGAGTCGAT                   | 63                | NM_018558        |
| $\pi$ ( <i>GABRP</i> )       | F: GGCCTTGCTAGAATATGCAGTTG<br>R: CTTTGTGTCCCCCTATCTTTGG              | 76                | NM_014211        |
| $\rho$ 1( <i>GABRR1</i> )    | Hs00266687_m1 from AppliedBiosystem                                  | 94                | NM_002042        |
| $\rho$ 2 ( <i>GABRR2</i> )   | F: CCTAGAAGAGGGCATAGACATCG<br>R: TCCAGTAGCTGCTGCATTGTTTG             | 99                | NM_002043        |
| $\rho$ 3 ( <i>GABRR3</i> )   | F: TGATGCTTTCATGGGTTTCA<br>R: CGCTCACAGCAGTGATGATT                   | 111               | NM_001105580     |
| GABArap ( <i>GABARAP</i> )   | F: AGGCTCCCAAAGCTCGGATA<br>R: AATTCGCTTCCGGATCAAGA                   | 100               | NM_007278        |
| Gephyrin ( <i>GPHN</i> )     | F: TGATCCTTACTAACCACGACCA<br>R: TTTATCCCACTGCGGTCTTC                 | 97                | NM_020806        |
| Hap1 ( <i>HAP1</i> )         | F: GAGGCCTCTCAACTCGACAC<br>R: CTGCTCCACACACTCCAGAA                   | 66                | NM_003949        |
| Radixin ( <i>RDX</i> )       | F: TGGAACGTCTAAAACAATTGAAG                                           | 106               | NM_002906        |

|                                |                                                                                   |     |              |
|--------------------------------|-----------------------------------------------------------------------------------|-----|--------------|
| GAT1 ( <i>SLC6A1</i> )         | R: TTTGCTCGTTTTCGTTCTTG<br>F: GGGAGCTACAACCTTTCCACAAC<br>R: CGAATTGATGCAGCAGACGAT | 66  | NM_003042.2  |
| GAT2 ( <i>SLC6A13</i> )        | F: TCTGTGTGGCTTGGGTTTACG<br>R: TGTACCCAATCATGTCTTCGATGT                           | 66  | NM_016615.2  |
| GAT3 ( <i>SLC6A11</i> )        | F: ATGCCACCTCCCCTGTCAT<br>R: TGCTCGATCCCGTCAGAGAT                                 | 67  | NM_014229.1  |
| BGT1 ( <i>SLC6A12</i> )        | F: ACGACCTGCAACAACCTTTTGG<br>R: GCTCCTGAGTGGTTCAGAAAGTC                           | 62  | NM_003044.2  |
| <i>GABBR1</i>                  | F: TGGCATGGACGCTTATCGA<br>R: GATCATCCTTGGTGCTGTCATAGT                             | 78  | NM_001470.2  |
| <i>GABBR2</i>                  | F: CTGGTATTCGTGCCGAAGCT<br>R: TGAACCTGGAATCGCCTGTTCT                              | 76  | NM_005458.6  |
| GAD65 ( <i>GAD2</i> )          | F: CTACGCGTTTTCTCCATGCAA<br>R: GCCAAAGTGGGCCTTTCTC                                | 63  | NM_000818    |
| GAD67 ( <i>GAD1</i> )          | F: CACCAGTTGCTGGAAGGCAT<br>R: GAGGATGACCTGTGCGAACC                                | 124 | NM_000817    |
| NKCC1( <i>SLC12A2</i> )        | F: ATCAATTTTTTCAGTATTCCATGCATC<br>R: ACGCCATCCTGGAGATTTTG                         | 51  | NM_001046    |
| KCC2 ( <i>SLC12A5</i> )        | F: CAAGGGTCCAACCTTTTCCTG<br>R: GCCTCTCGGTTTCTTCCTCT                               | 152 | NM_001134771 |
| $\beta$ -actin ( <i>ACTB</i> ) | F: CCTGGCACCCAGCACAAT<br>R: GGGCCGGACTCGTCATACT                                   | 144 | NM_001101.2  |

---
